# Supplementary material
Source: publisher figshare collection journal article supplement (https://gsapubs.figshare.com/articles/dataset/_/21067456)
Supplement: Supplementary file 1 [file 1]

Zhenchao Wang, Zhaochong Zhang, Marc K. Reichow, Wei Tian, Weiliang Kong, and Bingxiang Liu, 2022, Tracing decarbonated eclogite in the mantle sources of Tarim continental flood basalts using Zn isotopes: GSA Bulletin, <https://doi.org/10.1130/B36502.1>.

## Supplemental Material

**Supplemental file 1.** Calculation details of nonmodal batch melting modeling of peridotite with different proportions of garnet in Figure 6B.

**Supplemental file 2.** Calculation details of mixing model of melt derived from garnet peridotite and decarbonated eclogite in Figure 11.
